# Supplementary material
Source: publisher figshare collection journal article supplement (https://tandf.figshare.com/ndownloader/files/20971989)
Supplement: Supplementary file 1 [file 20971989]

**Supplementary information**

**for**

**Toward Biological Aerosol Reference Standards**

M. B. Harta, C. S. Scottoa, J. E. Tuckera, D. C. Mcphersonb, Z. Minterc, J. Kesavand, D. Silcotte, H-B. Linf, and J. D. Eversolea

1. Naval Research Laboratory (NRL), 4555 Overlook Ave. NW, Washington, DC, US 20375
2. DoD BSAT Biorisk Program Office, 1546 Porter Street, Suite 308, Ft. Detrick, MD, US 21702
3. National Strategic Research Institute, Special Projects Directorate, 11905 Bowman Dr., Suite 504, Fredericksburg, VA, US 22405
4. US Army CCDC CBC, Building E5951, Aberdeen Proving Ground, MD 21010
5. S3i, LLC, 1135 Saffell Road, Reisterstown, MD 21136
6. Retired from NRL Code 5612. Currently at: 7390 Gold Rush Ct., Las Vegas, NV 89113

**BA Sterne Spore Protocol**

Project: Prediction of Aerosol Viability from Exposure on Surfaces (PAVES)

Task: Bacillus anthracis Sterne Spore Preparation- Set #1

**Timeline and Steps:**

7/3/17- a plate of Bacillus anthracis Sterne was struck from frozen culture collection (Lot# 032607). Plates were left at RT for 48 hours due to holiday.

7/5/17- Growth was observed, with single colonies present. Plates were stored at 4°C in Lab 307fridge. Two 20 mL TSB cultures of Ba Sterne were started prior to storage.

7/7/17- Aliquoted 400 μl of the O/N/G broth culture and spread on to 4 Lab Lemko plates. (10 plates remain of same prep).

7/13/17- spores from sporulation set #1 were checked to assess number of vegetative cells vs. spores (microscope to analyze wet mounts). Culture seeded was at-90%. Spores will be harvested tomorrow.

7/14/17- Harvested spores off the 4 plates from sporulation set # 1; Washed 2 plates each with 15 ml of sterile water; Rewashed 4 plates total with 15 ml of sterile water before washing all with a third 10 ml
Therefore to harvest all the plates, 55 ml sterile water was used. The spores harvested from the plates were filtered through an autoclaved paper towel; The harvested suspension was centrifuged for 2 hours. Clear supernatant was aspirated and the pellet was washed with 40 ml of sterile water. The suspension was centrifuged again for 1 hour. The clear supernatant was aspirated and the pellet washed with 40 mL 0.1 % Tween 80. The suspension was centrifuged again, and the supernatant aspirated; The pellet was resuspended in 30 ml 0.1 % Tween 80; Suspension was stored at 4 °C for the weekend prior to being heat shocked due to water bath not being at the appropriate level.

7/18/2017 Sporulation set #1 suspension heat shocked at 65°C for 30 minutes to eliminate any remaining vegetative cells. Stock was also sonicated for 5 minutes and vortexed for 2 to break up any clumps of spores then returned to 4 °C. Prior to storage, the stock culture was enumerated. Spores analyzed under the microscope looked >95% with no vegetative cell burden

7/19/2017 The enumeration plates were counted and the stock titer averaged: 3.6x109/mL .A working stock was made by adding 5ml of 3.6E9 parent stock to 95 ml of 0.1% Tween 80; the working stock was divided between two tubes in which 2.5 mL of parents stock was added to 4 - 7.5 mL T-80 each. The working stock was enumerated.

7/20/2017 Enumeration plates were counted and the average l .25x 108 /mL. This working stock labeled as 1.25E8.
